# Supplementary material
Source: PubMed Central journal article supplement (PMC1820922)

4

7

pI

170 kDa

Mr

13 kDa

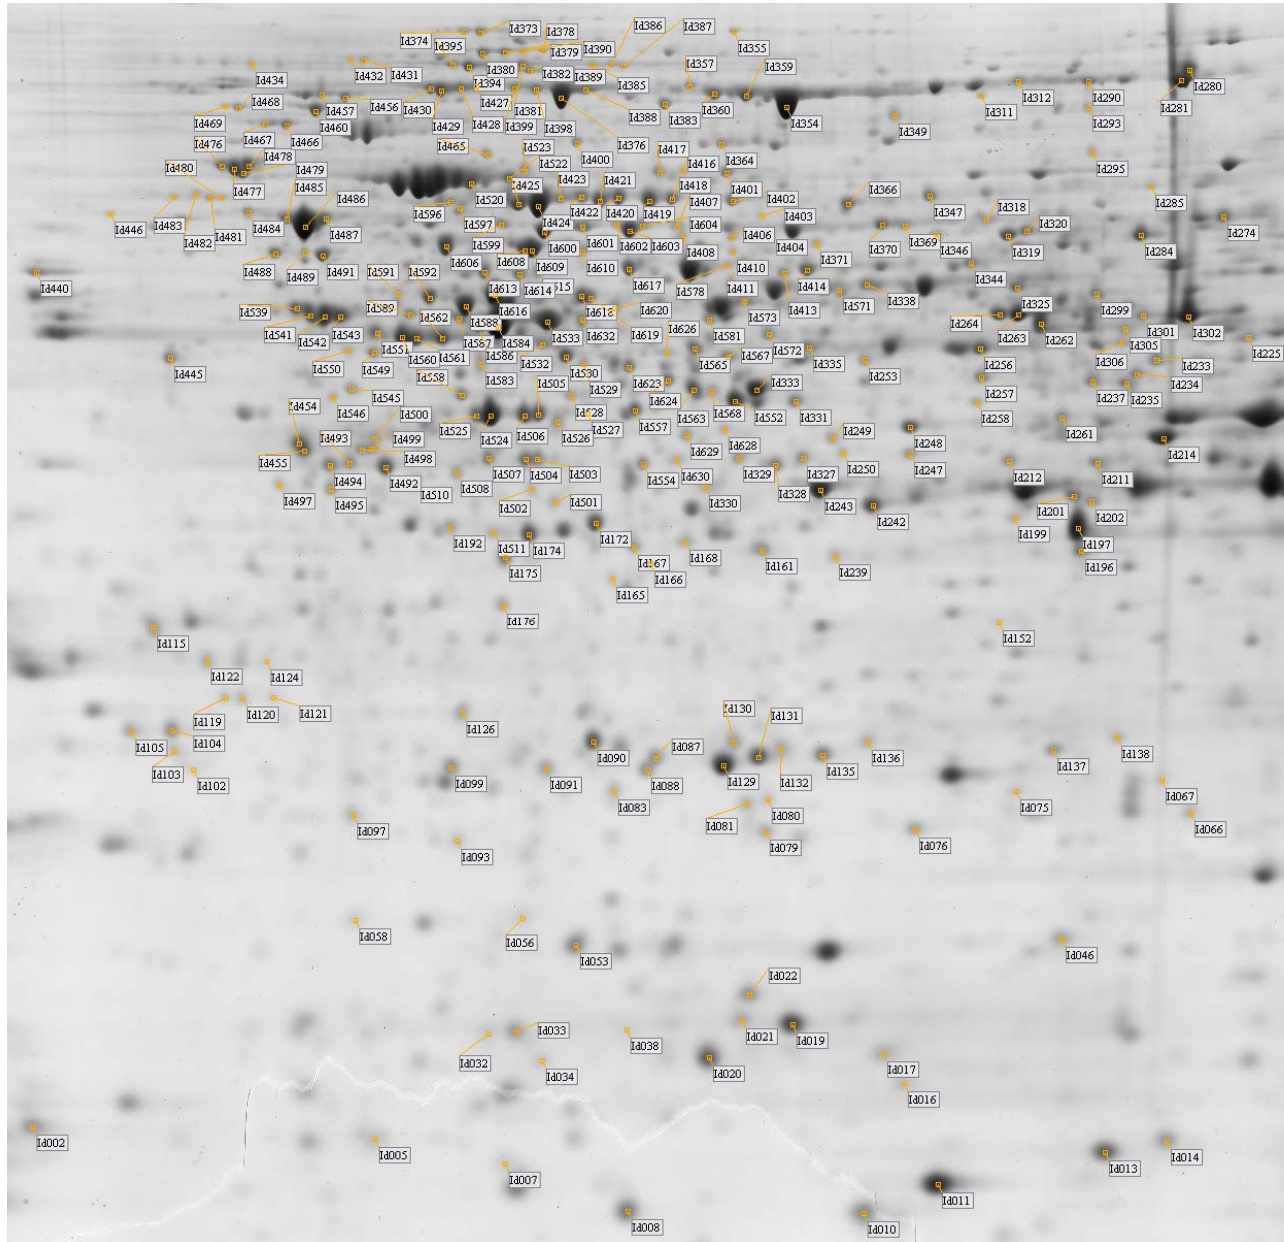

Supplement: plntphys_pp.106.092148_1.pdf [file plntphys_pp.106.092148_1.pdf]
